# Supplementary material for: Eco-friendly synthesis of high-quality polyaniline using a copper(ii) scorpionate catalyst
Source: Royal Society of Chemistry journal article supplement (doi:10.1039/b616816g), 2007-01-01
Supplement: b616816g.pdf [file b616816g.pdf]

# **ECO-FRIENDLY SYNTHESIS OF HIGH-QUALITY POLYANILINE USING A COPPER(II) SCORPIONATE CATALYST**

H. V. Rasika Dias\*, R. M. Gamini Rajapakse<sup>†</sup>, D. M. Milan Krishantha, Mauro Fianchini, Xiaoyu Wang, and Ronald L. Elsenbaumer

**Supplementary material**

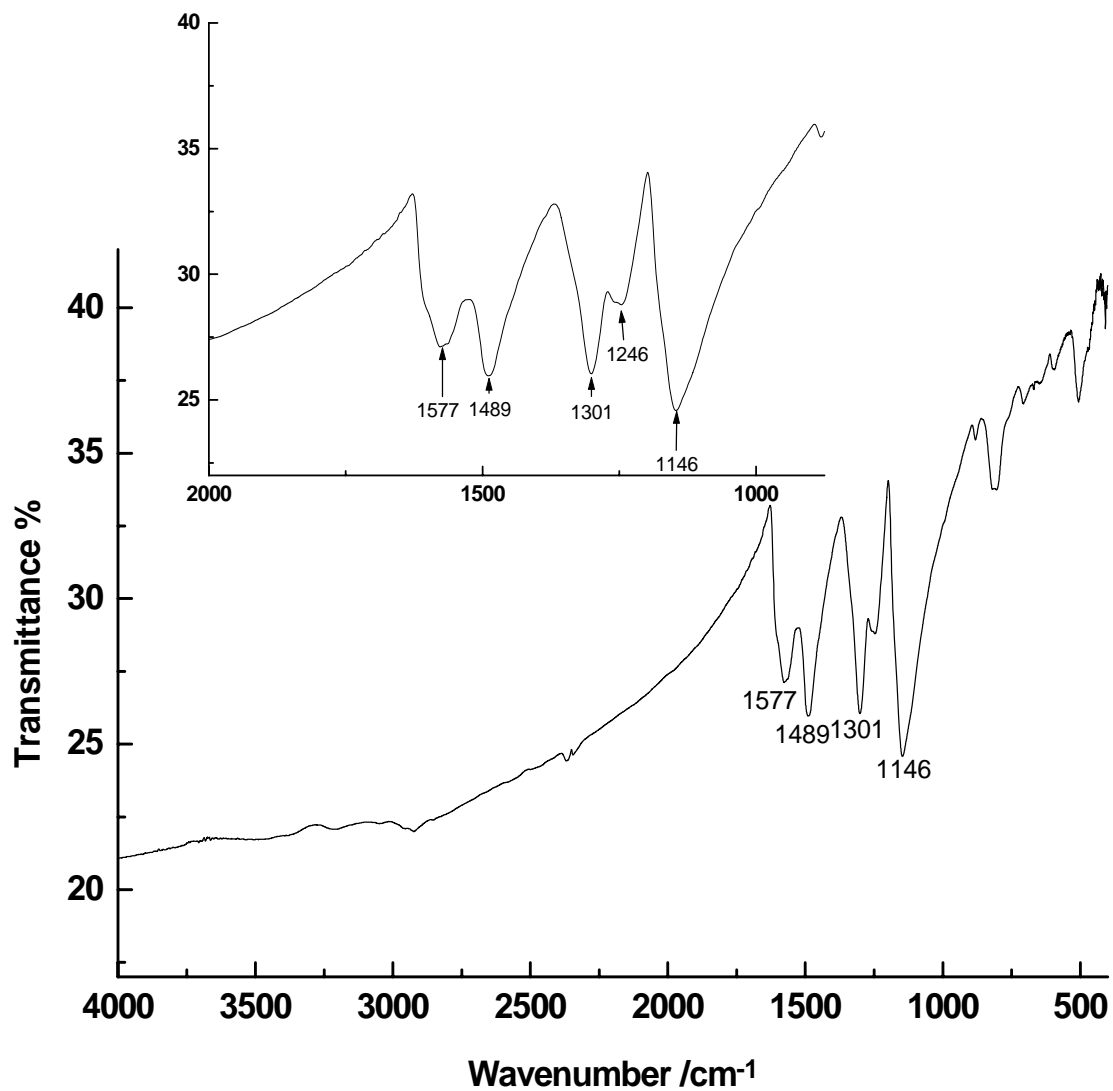

**Figure S1.** The FT-IR spectrum (KBr pellet) of polyaniline sample prepared using [MeB(3-(Mes)Pz)<sub>3</sub>]CuCl catalyst in acetonitrile.

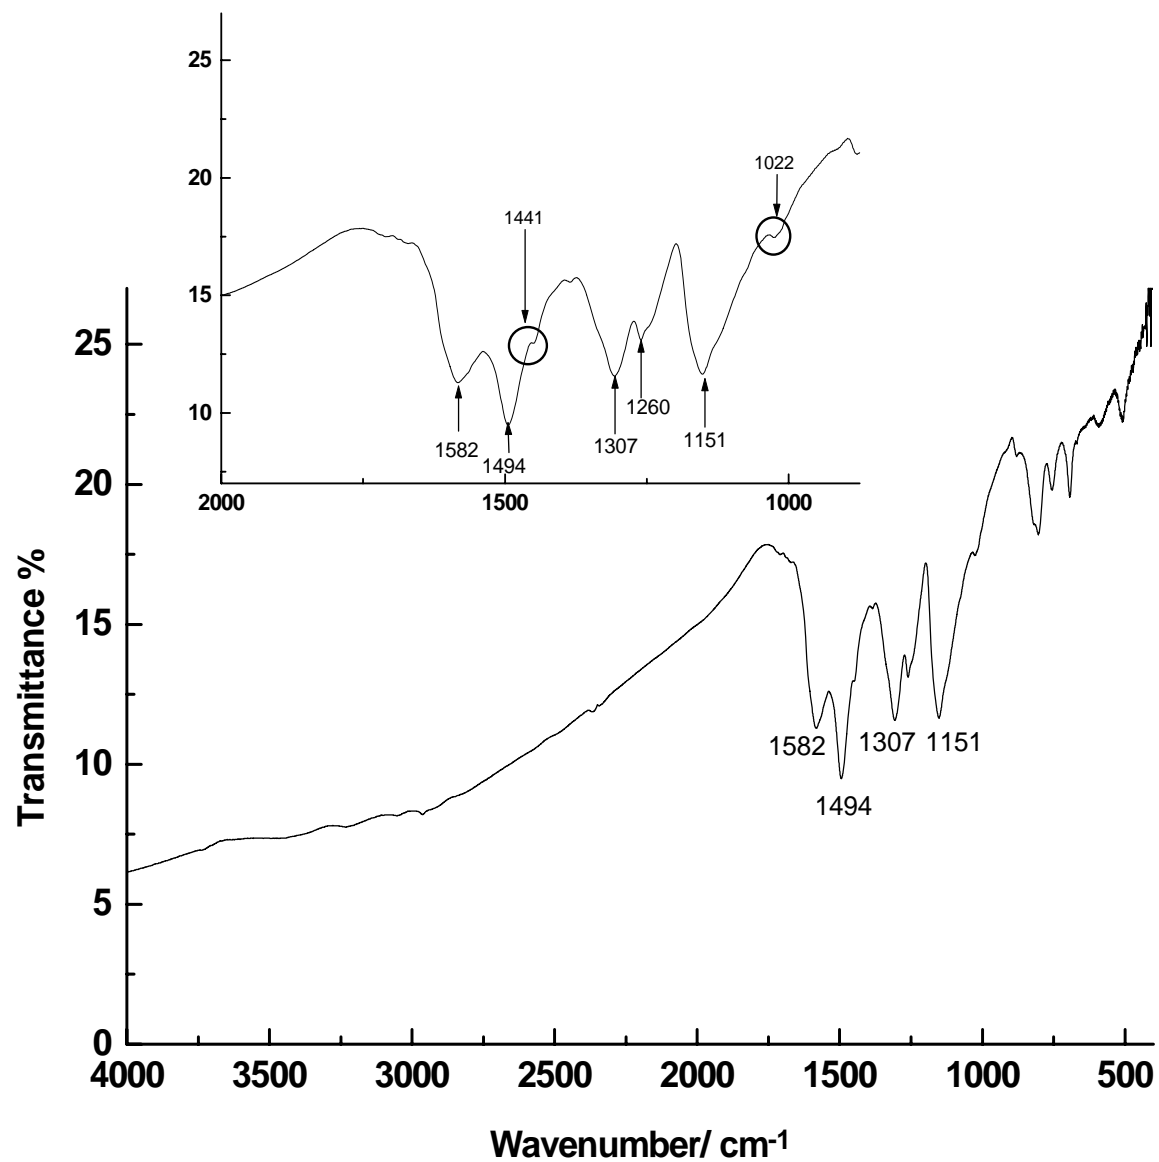

**Figure S2.** The FT-IR spectrum (KBr pellet) of polyaniline sample prepared using  $\text{CuCl}_2 \cdot 2\text{H}_2\text{O}$  in 1:1 acetonitrile:water

**Table S1.** Selected analytical data on PANI obtained using aniline or aniline dimer (*N*-(4-aminophenyl)aniline) under different conditions (ACN = acetonitrile)

| C atalyst                            | Reaction time (h) | Starting Material | Mol e ratio of monomer:catalyst:H <sub>2</sub> O <sub>2</sub> :HCl | Reaction medium             | Dry weight of as-prepared sample (g) | Conductivity S/cm <sup>-1</sup> As-prepared sample | Conductivity S/cm <sup>-1</sup> After doping |
|--------------------------------------|-------------------|-------------------|--------------------------------------------------------------------|-----------------------------|--------------------------------------|----------------------------------------------------|----------------------------------------------|
| [MeB(3-(Mes)Pz) <sub>3</sub> ]CuCl   | 48                | aniline           | 1:0.02:1.5:1                                                       | ACN                         | 0.750                                | 1.240                                              | 4.466                                        |
| [MeB(3-(Mes)Pz) <sub>3</sub> ]CuCl   | 48                | aniline           | 1:0.02:1.5:1                                                       | ACN:H <sub>2</sub> O<br>1:1 | 0.357                                | 0.0064                                             | 0.0520                                       |
| [MeB(3-(Mes)Pz) <sub>3</sub> ]CuCl   | 48                | aniline           | 1:0.02:1.5:1                                                       | H <sub>2</sub> O            | 0.112                                | 0.00012                                            | 0.0003                                       |
| [MeB(3-(Mes)Pz) <sub>3</sub> ]CuCl   | 48                | aniline           | 1:0.02:1.5:0                                                       | ACN                         | 0.094                                | Non-conduct.                                       | Non-conduct.                                 |
| [MeB(3-(Mes)Pz) <sub>3</sub> ]CuCl   | 48                | aniline dimer     | 1:0.02:1.5:1                                                       | ACN                         | 1.830                                | 0.00053                                            | 0.0021                                       |
| [MeB(3-(Mes)Pz) <sub>3</sub> ]CuCl   | 48                | aniline dimer     | 1:0.02:1.5:2                                                       | ACN                         | 1.650                                | 0.00885                                            | 0.0097                                       |
| CuCl <sub>2</sub> •2H <sub>2</sub> O | 48                | aniline           | 1:0.02:1.5:1                                                       | ACN:H <sub>2</sub> O<br>1:1 | 0.291                                | 0.00026                                            | 0.0032                                       |
| CuCl <sub>2</sub> •2H <sub>2</sub> O | 24                | aniline dimer     | 1:0.02:1.5:1                                                       | ACN:H <sub>2</sub> O<br>1:1 |                                      |                                                    | 0.00004                                      |
| Without catalyst                     | 48                | aniline           | 1:0:1.5:1                                                          | ACN:H <sub>2</sub> O<br>1:1 | 0.025                                |                                                    |                                              |
| [MeB(3-(Mes)Pz) <sub>3</sub> ]CuCl   | 24                | aniline dimer     | 1:0.05:1.5:1                                                       | ACN:H <sub>2</sub> O<br>1:1 | 0.500                                |                                                    | 3.4 × 10 <sup>-4</sup>                       |
| [MeB(3-(Mes)Pz) <sub>3</sub> ]CuCl   | 24                | aniline dimer     | 1:0.05:1.5:0                                                       | ACN:H <sub>2</sub> O<br>1:1 | 0.150                                |                                                    | 4 × 10 <sup>-6</sup>                         |
